# Supplementary material for: Comparing Characteristics of Endometrial Cancer in Women of South Asian and White Ethnicity in England
Source: Cancers (Basel). 2021 Dec 5;13(23):6123. doi: 10.3390/cancers13236123 (PMC8657185; doi:10.3390/cancers13236123)
Supplement: Supplementary file 1 [file cancers-13-06123-s001.zip › cancers-1240864-supplementary.pdf]

**Table S1.** Linear regression of Age at Diagnosis

| Term                                              | Coefficient ( $\beta$ ) | 95% CI for $\beta$ | P Value |
|---------------------------------------------------|-------------------------|--------------------|---------|
| Ethnicity (South Asian)                           | −14.51                  | −20.98 to −8.04    | <0.001  |
| Diabetes Status (Yes)                             | 11.44                   | 5.66 to 17.22      | <0.001  |
| BMI (kg/m <sup>2</sup> )                          | −0.23                   | −0.31 to −0.15     | <0.001  |
| Ethnicity (South Asian)* BMI (kg/m <sup>2</sup> ) | 0.23                    | 0.03 to 0.42       | 0.023   |
| Diabetes Status (Yes)* BMI (kg/m <sup>2</sup> )   | −0.21                   | −0.37 to −0.05     | 0.009   |
| Constant                                          | 73.19                   | 70.57 to 75.80     | <0.001  |

**Table S2.** Characteristics of subgroup, n = 216.

| Characteristics           | Categories                    | White Ethnicity<br>(N = 176) | South Asian Ethnicity<br>(N = 40) | p-Value <sup>*,*</sup> |
|---------------------------|-------------------------------|------------------------------|-----------------------------------|------------------------|
| Age at diagnosis in years | Mean (SD)                     | 64.8 (10.6)                  | 59.9 (10.3)                       | 0.008                  |
|                           | Median (IQR)                  | 64.5 (57, 73)                | 59.9 (54.5, 67)                   | 0.011                  |
| BMI in Kg/m <sup>2</sup>  | Mean (SD) <sup>^</sup>        | 36.6 (9.6)                   | 33.9 (7.3)                        | 0.087                  |
|                           | Median (IQR) <sup>^</sup>     | 32.3 (29, 39)                | 35.7 (30, 42)                     | 0.095                  |
| Age group                 | Below 55                      | 27 (15.3%)                   | 10 (25.0%)                        | 0.119                  |
|                           | 55–69                         | 82 (46.6%)                   | 21 (52.5%)                        |                        |
|                           | 70 and above                  | 67 (38.1%)                   | 9 (22.5%)                         |                        |
| BMI group                 | Below 30                      | 41 (23.3%)                   | 13 (32.5%)                        | 0.417 <sup>*</sup>     |
|                           | 30–40                         | 80 (45.5%)                   | 18 (45.0%)                        |                        |
|                           | 40 and above                  | 53 (30.1%)                   | 9 (22.5%)                         |                        |
|                           | Missing                       | 2 (1.1%)                     | 0 (0%)                            |                        |
| Type II diabetes          | No                            | 146 (83.0%)                  | 21 (52.5%)                        | < 0.001                |
|                           | Yes                           | 30 (17.0%)                   | 19 (47.5%)                        |                        |
| Metformin use             | No                            | 156 (88.6%)                  | 29 (72.5%)                        | 0.009                  |
|                           | Yes                           | 20 (11.4%)                   | 11 (27.5%)                        |                        |
| Histological subtype      | Endometrioid                  | 150 (85.2%)                  | 33 (82.5%)                        | 0.632                  |
|                           | Non-Endometrioid              | 26 (14.8%)                   | 7 (17.5%)                         |                        |
| Stage of cancer           | Stage I                       | 153 (86.9%)                  | 36 (90.0%)                        | 0.611 <sup>*</sup>     |
|                           | Stage II                      | 9 (5.1%)                     | 3 (7.5%)                          |                        |
|                           | Stage III & IV                | 10 (5.7%)                    | 1 (2.5%)                          |                        |
|                           | Unknown/Missing               | 4 (2.3%)                     | 0 (0%)                            |                        |
| Grade of cancer           | Grade 1                       | 112 (63.6%)                  | 21 (52.5%)                        | 0.190 <sup>*</sup>     |
|                           | Grade 2                       | 24 (13.6%)                   | 10 (25.0%)                        |                        |
|                           | Grade 3                       | 37 (21.0%)                   | 9 (22.5%)                         |                        |
|                           | Unknown                       | 3 (1.7%)                     | 0 (0%)                            |                        |
| Risk group                | Low                           | 113 (64.2%)                  | 19 (47.5%)                        | 0.008 <sup>*</sup>     |
|                           | Intermediate & H-intermediate | 27 (15.3%)                   | 15 (37.5%)                        |                        |
|                           | High and advanced             | 32 (32.0%)                   | 6 (15.0%)                         |                        |
|                           | Unknown/not applicable        | 4 (2.3%)                     | 0 (0%)                            |                        |

Data are n (%), unless otherwise stated.

<sup>^</sup> Based on patients with available BMI data.

<sup>\*</sup> p-value < 0.05 were considered significant

<sup>\*</sup> P-value of the categorical variables were calculated using chi-square test excluding the unknown/missing

Abbreviations: BMI = Body Mass Index; SD = standard deviation; IQR = Inter-quartile range

**Table S3.** Descriptive statistics of waist:hip ratio by ethnicity for each BMI group.

| Measurements    | BMI Group | South Asian Ethnicity<br>(n = 22) |              | White Ethnicity<br>(n = 77) |              |
|-----------------|-----------|-----------------------------------|--------------|-----------------------------|--------------|
|                 |           | N                                 | Mean (SD)    | N                           | Mean (SD)    |
| Waist (cm)      | BMI < 30  | 7                                 | 91.4 (11.2)  | 16                          | 92.6 (11.2)  |
|                 | BMI 30–39 | 11                                | 108.5 (11.4) | 35                          | 110.9 (8.9)  |
|                 | BMI 40–49 | 3                                 | 123.7 (8.6)  | 17                          | 129.0 (11.1) |
|                 | BMI ≥ 50  | 1                                 | 130 (0.0)    | 9                           | 132 (11.5)   |
| Hip (cm)        | BMI < 30  | 7                                 | 101 (6.2)    | 16                          | 104.2 (8.0)  |
|                 | BMI 30–39 | 11                                | 121.6 (9.7)  | 35                          | 121.1 (9.8)  |
|                 | BMI 40–49 | 3                                 | 133.7 (9.0)  | 17                          | 143.0 (7.2)  |
|                 | BMI ≥ 50  | 1                                 | 141 (0.0)    | 9                           | 153.7 (9.3)  |
| Waist:Hip ratio | BMI < 30  | 7                                 | 0.90 (0.07)  | 16                          | 0.89 (0.08)  |
|                 | BMI 30–39 | 11                                | 0.89 (0.06)  | 35                          | 0.92 (0.05)  |
|                 | BMI 40–49 | 3                                 | 0.93 (0.03)  | 17                          | 0.89 (0.06)  |
|                 | BMI ≥ 50  | 1                                 | 0.92 (0.0)   | 9                           | 0.86 (0.07)  |

Abbreviations: N = number of patients; BMI = Body Mass Index; SD = standard deviation
